# Supplementary material
Source: PubMed Central journal article supplement (PMC6727620)
Supplement: am9b07500_si_001.pdf [file am9b07500_si_001.pdf]

# Supporting Information: Mixed-Matrix Membranes Formed from Imide-Functionalized UiO-66-NH<sub>2</sub> for Improved Interfacial Compatibility

*Qihui Qian, Albert X. Wu, Won Seok Chi, Patrick A. Asinger, Sharon Lin, Asia Hypsher and  
Zachary P. Smith\**

\* Email address: [zpsmith@mit.edu](mailto:zpsmith@mit.edu)

Department of Chemical Engineering, Massachusetts Institute of Technology, Cambridge, MA  
02139, United States

**Section A: Supporting characterization results for the Pure MOF and PSM-MOF**

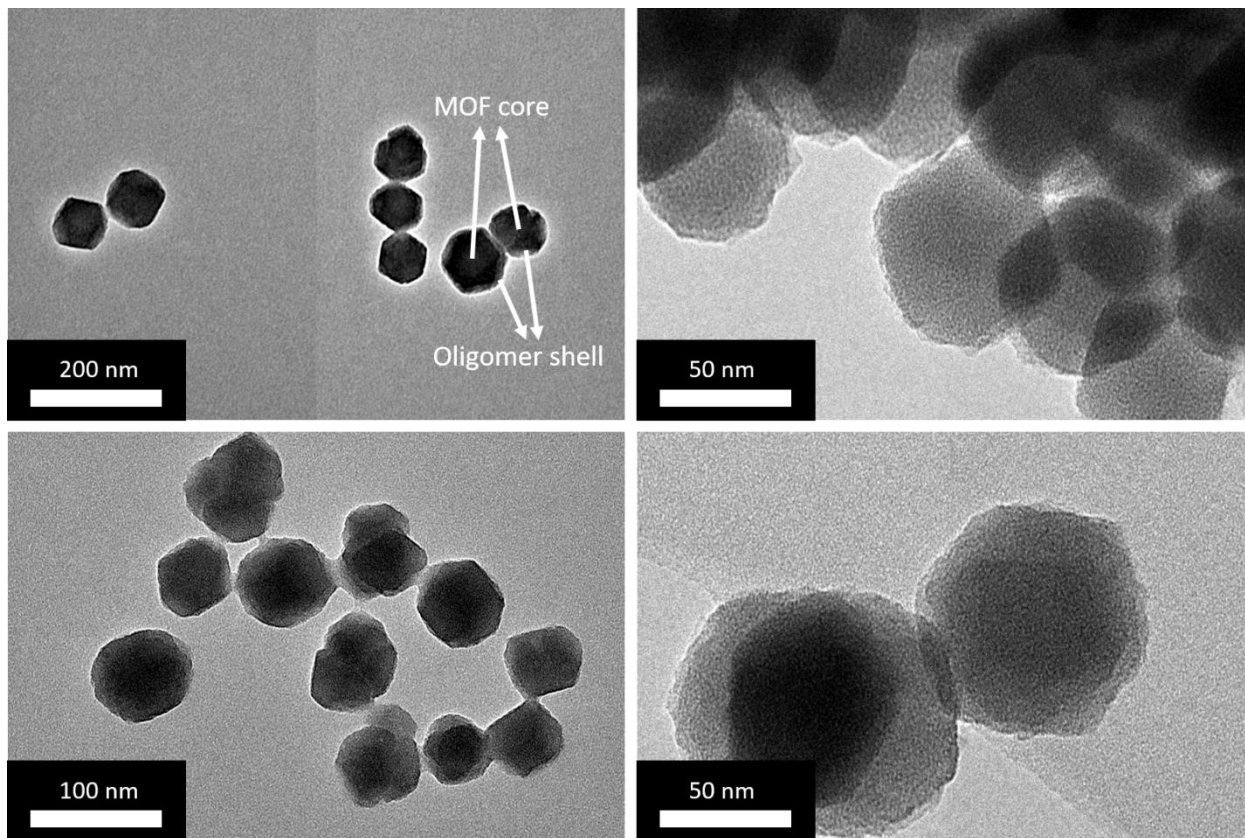

Figure S1. TEM images of oligomer-coated UiO-66-NH<sub>2</sub> under different magnifications. MOF core and oligomer shell are labeled in the left top image. Different surface structures can be observed between these PSM-MOF structures and the pure-MOF structures, as shown in Figure 2.

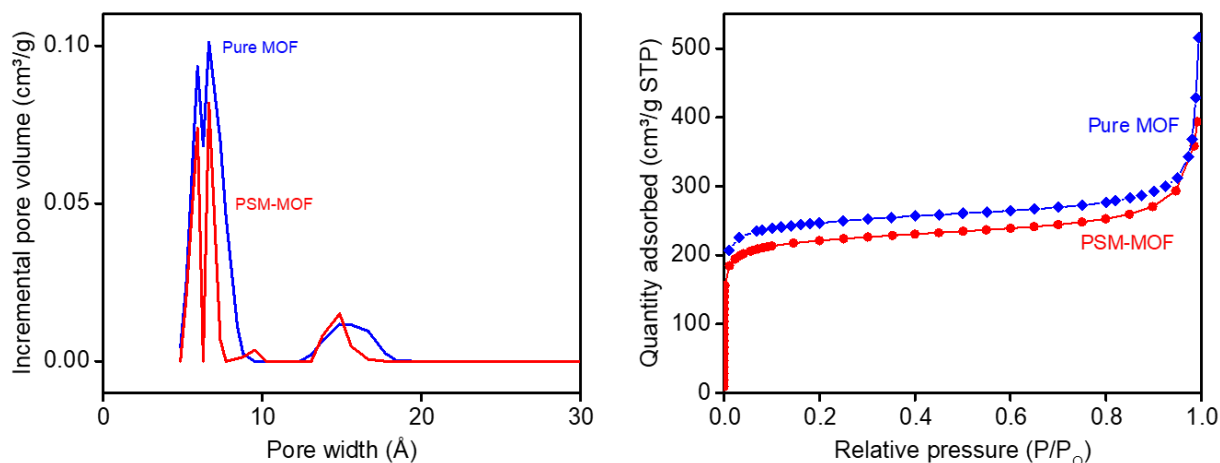

Figure S2. Pore size distribution and N<sub>2</sub> adsorption isotherms for Pure MOF and PSM-MOF. Pore size distribution was calculated using the built-in function of Micromeritics 3Flex Share software based on N<sub>2</sub>@Tarazona NLDFT Model.

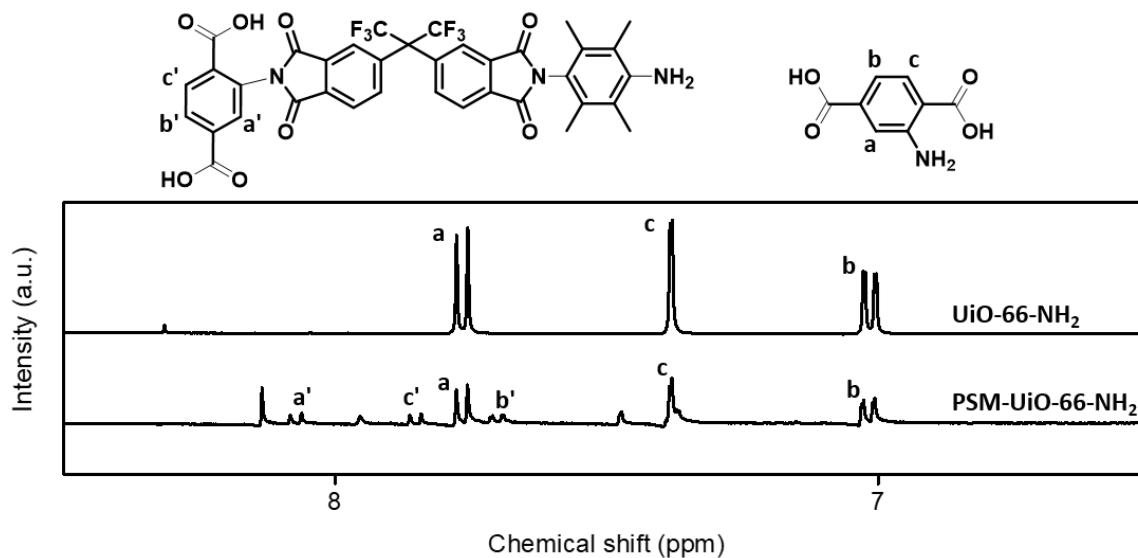

Figure S3. <sup>1</sup>H NMR spectra change upon 6FDA-Durene oligomer PSM of UiO-66-NH<sub>2</sub>. Peaks were assigned according to the literature<sup>10</sup>. Unassigned peaks may result from coupling and exchange effects from HF and 6FDA-Durene oligomer.

**Section B: Supporting characterization results for the MMMs and upper bound plots**

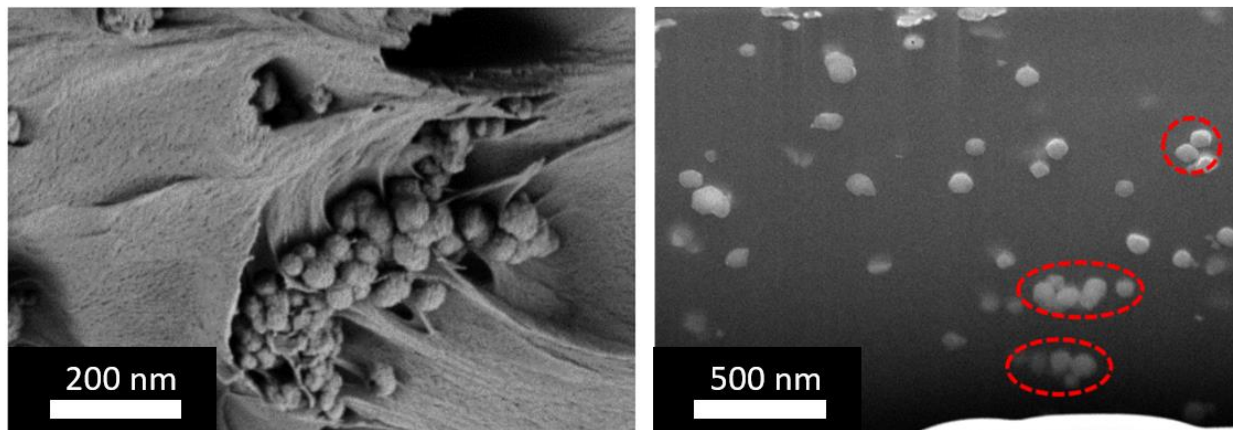

Figure S4. Cross-sectional FESEM (left) and FIB-SEM (right) images of 10% Pure MOF MMM. Both images show more serious particle aggregation than for the PSM-MOF MMMs.

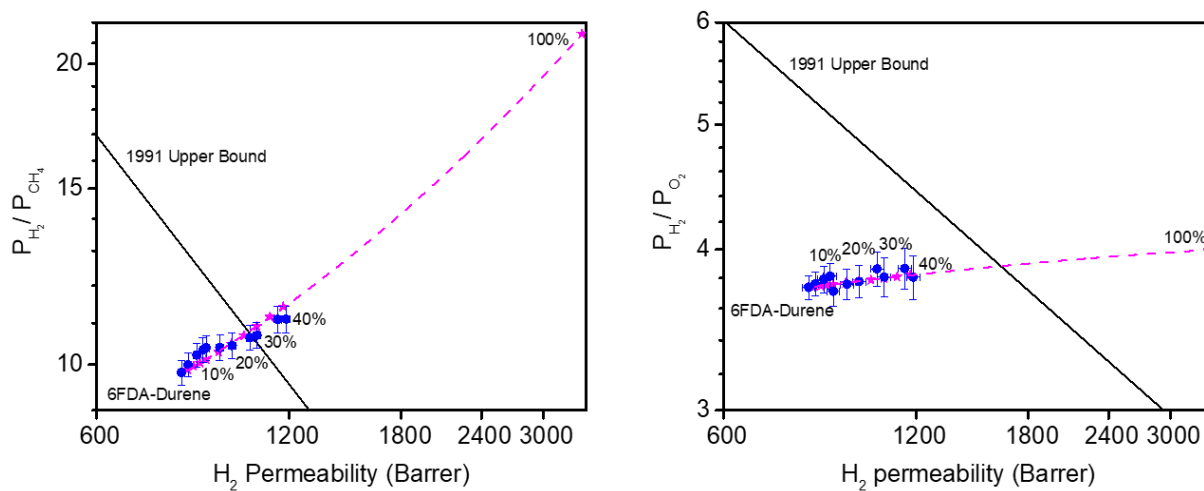

Figure S5.  $H_2/CH_4$  and  $H_2/O_2$  upper bound plots (blue circles: experimental data; pink stars: Maxwell Model predictions)

Table S1. CO<sub>2</sub>/CH<sub>4</sub> separation data for MOF-based MMMs from the literature

| MOF                                 | Loading (wt%) | Polymer                      | Pressure (bar) | CO <sub>2</sub> permeability (Barrer) | Selectivity CO <sub>2</sub> /CH <sub>4</sub> | Ref.                          |
|-------------------------------------|---------------|------------------------------|----------------|---------------------------------------|----------------------------------------------|-------------------------------|
| 6FDA-Durene/ UiO-66-NH <sub>2</sub> | 40            | 6FDA-Durene                  | 1              | 1890                                  | 17.7                                         | This work                     |
| NH <sub>2</sub> -UiO-66-ABA         | 30            | Matrimid®                    | 9              | 37.9                                  | 47.7                                         | Vankelecom, 2015 <sup>1</sup> |
| UiO-66-NH <sub>2</sub>              | 30            | PAO-PIM-1                    | N.A.           | 8126                                  | 18.4                                         | Jin, 2017 <sup>2</sup>        |
| UiO-66-NH <sub>2</sub>              | 20            | PIM-1 (in-situ crosslinking) | 2              | 15815                                 | 19.1                                         | Kaliaguine, 2018 <sup>3</sup> |
| PEG@UiO-66-NH <sub>2</sub>          | 40            | PEBAX®                       | 3              | 425                                   | 56                                           | Qiao, 2017 <sup>4</sup>       |

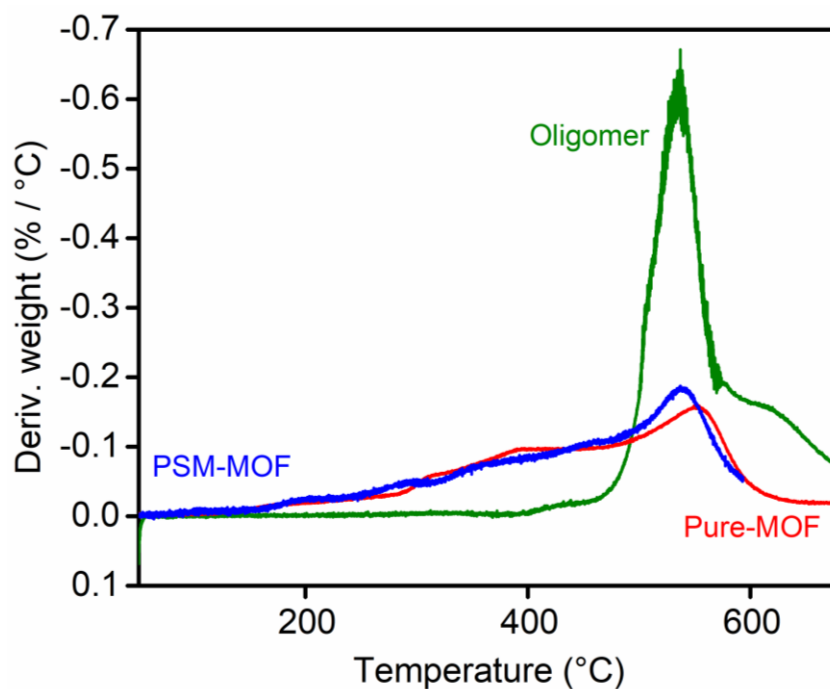

Figure S6. Derivative Thermal Gravimetric Analysis of the oligomer, Pure-MOF and PSM-MOF. Different stages of weight loss can be observed for the oligomer and the Pure-MOF.

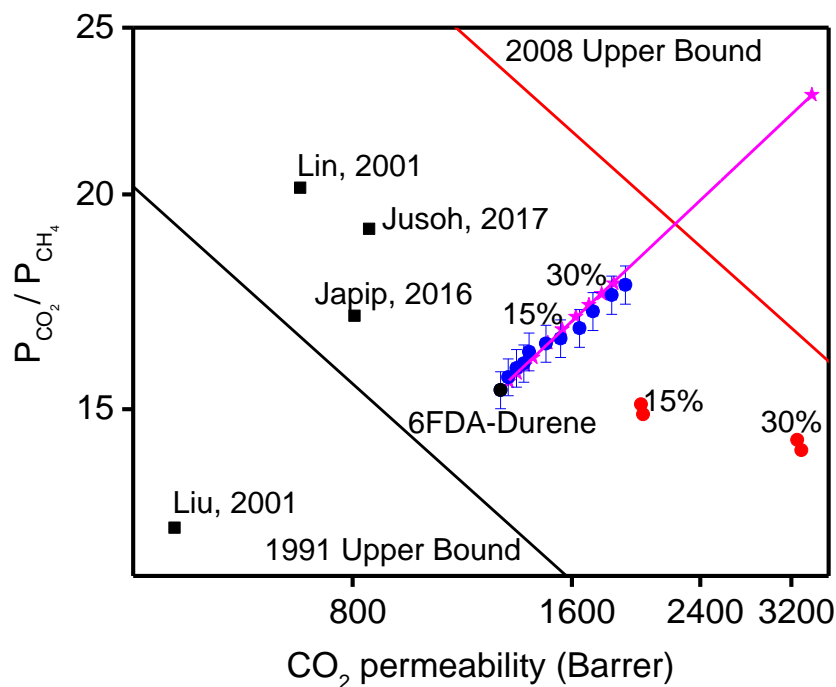

Figure S7. CO<sub>2</sub>/CH<sub>4</sub> upper bound plot with comparative literature data for 6FDA-Durene (black circle: experimental data for 6FDA-Durene; blue circles: experimental data for PSM-MOF MMM; pink stars: Maxwell Model predictions; red circles: experimental data for Pure MOF MMM; black squares: literature data for 6FDA-Durene<sup>6-9</sup>). The difference in reported transport properties for 6FDA-Durene relates to differences in casting conditions and the temperature/pressure at which data were obtained.

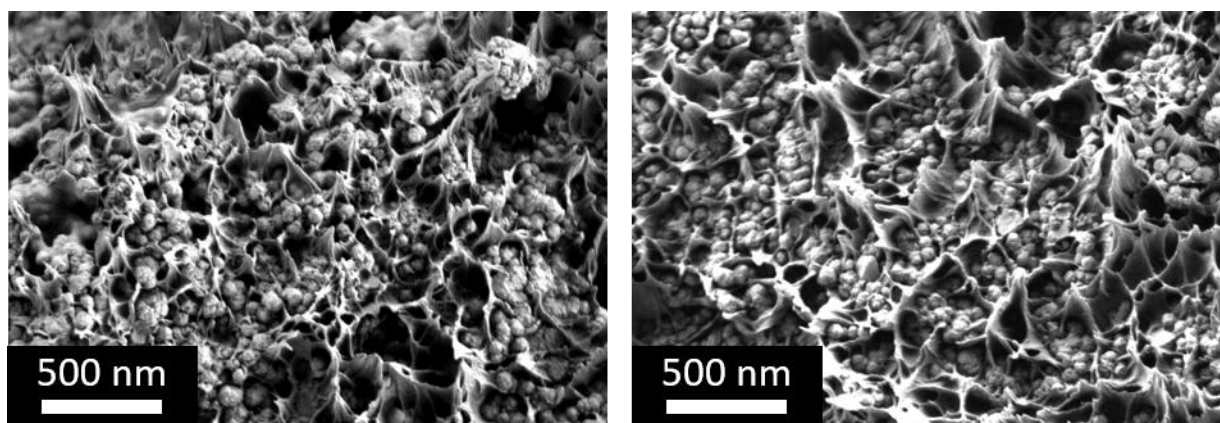

Figure S8. Cross-sectional SEM images of 40% PSM-MOF MMM taken near the top surface (left) and bottom surface (right).

Table S2. Permeation results for independently prepared samples of 6FDA-Durene and corresponding MMMs to evaluate reproducibility.

| Loading (wt%) | Permeability (Barrer) |         |                |         |                |         |                |         |                 |         |
|---------------|-----------------------|---------|----------------|---------|----------------|---------|----------------|---------|-----------------|---------|
|               | CH <sub>4</sub>       |         | N <sub>2</sub> |         | O <sub>2</sub> |         | H <sub>2</sub> |         | CO <sub>2</sub> |         |
|               | Trial 1               | Trial 2 | Trial 1        | Trial 2 | Trial 1        | Trial 2 | Trial 1        | Trial 2 | Trial 1         | Trial 2 |
| <b>0%</b>     | 83±3                  | 81±3    | 86±3           | 85±3    | 218±7          | 210±7   | 820±20         | 810±20  | 1280±40         | 1250±40 |
| <b>2.5%</b>   | 84±3                  | 84±3    | 86±3           | 88±3    | 222±7          | 228±7   | 840±30         | 860±30  | 1310±40         | 1340±40 |
| <b>5%</b>     | 84±3                  | 86±3    | 86±3           | 87±3    | 227±7          | 232±7   | 860±30         | 870±30  | 1340±40         | 1360±40 |
| <b>7.5%</b>   | 85±3                  | 85±3    | 87±3           | 88±3    | 231±7          | 232±7   | 880±30         | 880±30  | 1370±40         | 1370±40 |
| <b>10%</b>    | 86±3                  | 88±3    | 87±3           | 89±3    | 240±7          | 250±7   | 890±30         | 890±30  | 1400±40         | 1410±40 |
| <b>15%</b>    | 90±3                  | 88±3    | 92±3           | 90±3    | 249±7          | 249±7   | 940±30         | 930±30  | 1470±40         | 1450±40 |
| <b>20%</b>    | 94±3                  | 92±3    | 97±3           | 95±3    | 259±8          | 254±8   | 980±30         | 960±30  | 1540±40         | 1510±40 |
| <b>25%</b>    | 98±3                  | 99±3    | 103±3          | 106±3   | 270±9          | 280±9   | 1040±30        | 1060±30 | 1640±50         | 1670±50 |
| <b>30%</b>    | 100±3                 | 104±3   | 106±3          | 109±3   | 281±9          | 288±9   | 1070±30        | 1090±30 | 1710±50         | 1760±50 |
| <b>35%</b>    | 104±3                 | 102±3   | 108±3          | 106±3   | 300±10         | 295±10  | 1150±40        | 1130±40 | 1810±60         | 1800±60 |
| <b>40%</b>    | 107±3                 | 106±3   | 109±3          | 107±3   | 310±10         | 308±10  | 1180±40        | 1160±40 | 1890±60         | 1870±60 |

Table S3. Permeation results for Pure MOF MMMs

| Loading (wt%) | Permeability (Barrer) |                 | Selectivity                      |
|---------------|-----------------------|-----------------|----------------------------------|
|               | CH <sub>4</sub>       | CO <sub>2</sub> | CO <sub>2</sub> /CH <sub>4</sub> |
| <b>15%</b>    | 132                   | 1990            | 15.1                             |
| <b>30%</b>    | 226                   | 3260            | 14.4                             |

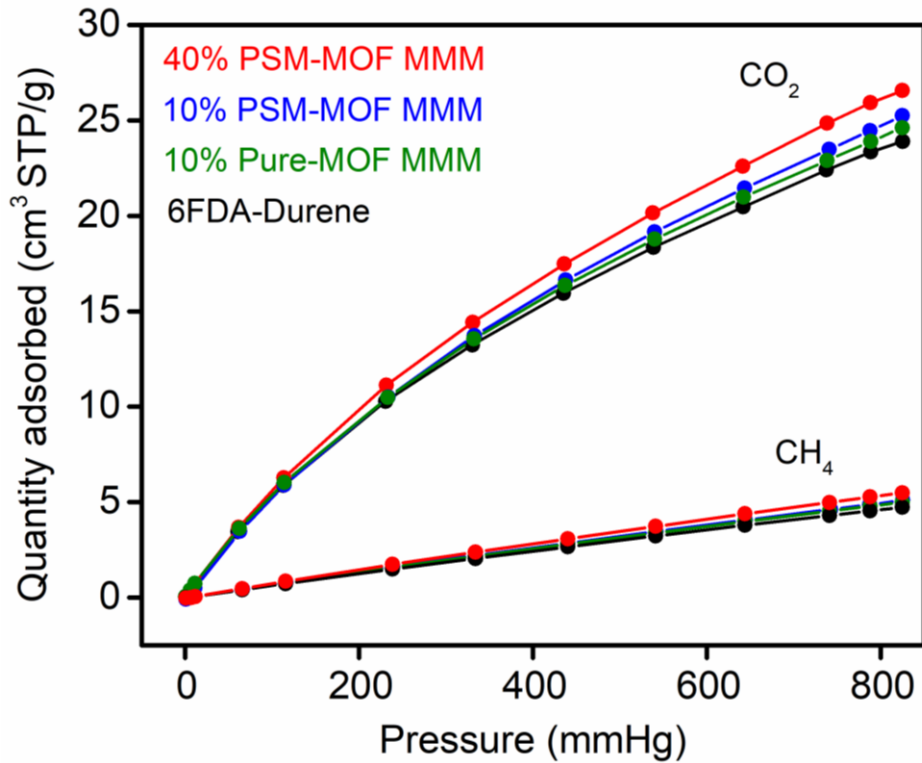

Figure S9. CO<sub>2</sub> and CH<sub>4</sub> sorption isotherms for 6FDA-Durene and corresponding MMMs.

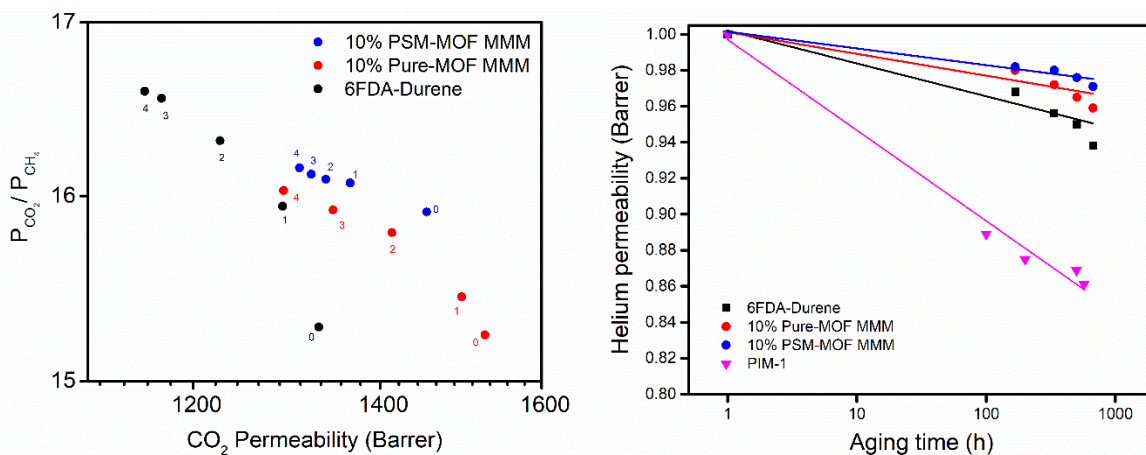

Figure S10. Physical aging of 6FDA-Durene and corresponding MMMs shown in CO<sub>2</sub>/CH<sub>4</sub> upper bound plot (left) and normalized helium permeability plot (right). The number indicates the week number of a specific test. PIM-1 aging data was added as a reference.



## Section C: Using the Maxwell model to predict transport in MMMs and volume fraction calculation

### C1. Gas transport prediction using the Maxwell Model

Experimental data ( $P_{\text{MMM}}$ ) at low loadings (below 20 wt%) were first used to calculate pure MOF permeability ( $P_f$ ) for each gas. These values ( $P_{\text{MMM}}$  at loadings below 20 wt% and  $P_f$ ) were then used together with the pure polymer permeability ( $P_p$ ) to predict MMM permeabilities at all loadings. Volume fractions of MOF loading were calculated as described in section C2.

### C2. Volume fraction calculation

TGA with an air sweep flow was used to determine the weight fraction of MOF fillers in MMMs. TGA profiles show that 6FDA-Durene decomposes completely under air flow at 700 °C (weight loss = 100%). Therefore, equation (1) was used to calculate the weight fraction of the MOF in the MMM:

$$\text{MOF loading (wt\%)} = \frac{\text{wt\% remained of MMM at 700 }^\circ\text{C}}{\text{wt\% remained of pure MOF at 700 }^\circ\text{C}} \quad (1)$$

To convert weight fraction to volume fraction, densities of the pure MOF and MMM are required. A crystal density of 1.36 g cm<sup>-3</sup> for the pure UiO-66-NH<sub>2</sub> was taken from Mason *et al.*<sup>5</sup> Density of MMMs can be measured using a density kit attached to a Mettler Toledo mass balance (30029886). Equation (2) was then used to convert weight fraction to volume fraction:

$$\text{MOF loading (vol\%)} = \frac{\text{MOF loading (wt\%)}}{\rho_{\text{MOF}}} \rho_{\text{MMM}} \quad (2)$$

where,  $\rho_{\text{MOF}}$  and  $\rho_{\text{MMM}}$  are the densities of the MOF and MMM, respectively.

## References

- (1) Anjum, M. W.; Vermoortele, F.; Khan, A. L.; Bueken, B.; Vos, D. E. De; Vankelecom, I. F. J. Modulated UiO-66-Based Mixed-Matrix Membranes for CO<sub>2</sub> Separation. *ACS Appl. Mater. Interfaces*, 2015, 7, 25193–25201.
- (2) Wang, Z.; Ren, H.; Zhang, S.; Zhang, F.; Jin, J. Polymers of Intrinsic Microporosity/Metal–organic Framework Hybrid Membranes with Improved Interfacial Interaction for High-Performance CO<sub>2</sub> Separation. *J. Mater. Chem. A*, 2017, 5, 10968–10977.
- (3) Tien-Binh, N.; Rodrigue, D.; Kaliaguine, S. In-Situ Cross Interface Linking of PIM-1 Polymer and UiO-66-NH<sub>2</sub> for Outstanding Gas Separation and Physical Aging Control. *J. Memb. Sci.*, 2018, 548, 429–438.
- (4) Xie, K.; Fu, Q.; Kim, J.; Lu, H.; He, Y.; Zhao, Q.; Scofield, J.; Webley, P. A.; Qiao, G. G. Increasing Both Selectivity and Permeability of Mixed-Matrix Membranes: Sealing the External Surface of Porous MOF Nanoparticles. *J. Memb. Sci.*, 2017, 535, 350–356.
- (5) Mason, J. A.; Veenstra, M.; Long, J. R. Evaluating Metal-Organic Frameworks for Natural Gas Storage. *Chem. Sci.*, 2014, 5, 32–51.
- (6) Lin, W. H.; Chung, T. S. Gas Permeability, Diffusivity, Solubility, and Aging Characteristics of 6FDA-Durene Polyimide Membranes. *J. Memb. Sci.*, 2001, 186, 183–193.
- (7) Liu, S. L.; Wang, R.; Liu, Y.; Chng, M. L.; Chung, T. S. The Physical and Gas Permeation Properties of 6FDA-Durene/2,6-diaminotoluene Copolyimides. *Polymer*, 2001, 42, 8847–8855.
- (8) Jusoh, N.; Yeong, Y. F.; Lau, K. K.; Shariff, A. M. Enhanced Gas Separation Performance Using Mixed Matrix Membranes Containing Zeolite T and 6FDA-Durene Polyimide. *J. Memb. Sci.*, 2017, 525, 175–186.
- (9) Japip, S.; Xiao, Y.; Chung, T. S. Particle-Size Effects on Gas Transport Properties of 6FDA-Durene/ZIF-71 Mixed Matrix Membranes. *Ind. Eng. Chem. Res.*, 2016, 55, 9507–9517.
- (10) Nagata, S.; Kokado, K.; Sada, K. Metal-Organic Framework Tethering PNIPAM for ON-OFF Controlled Release in Solution. *Chem. Commun.*, 2015, 51, 8614–8617.
